# Supplementary material for: Trp-574-Leu mutation in wild mustard (Sinapis arvensis L.) as a result of als inhibiting herbicide applications
Source: PeerJ. 2021 May 17;9:e11385. doi: 10.7717/peerj.11385 (PMC8136277; doi:10.7717/peerj.11385)
Supplement: Supplemental Information 2 [file peerj-09-11385-s002.xlsx]

## Sheet: Sayfa1
	A-007	A-022	Ç-017	T-010	T-011	T-012	T-034	T-036	T-038	T-050	Y-021	Y-022	Y-026
dose	response	response	response	response	response	response	response	response	response	response	response	response	response
0	2.49	2.5	3.17	3.27	2.64	3.64	2.52	3.13	2.86	3.11	1.85	2.78	2
0	2.96	3.03	1.94	3.02	2.73	2.49	2.51	2.52	3.62	2.71	1.7	2.56	2.03
0	2.26	2.27	2.3	2.33	2.83	3.75	2.36	2.67	3.13	3.53	2.06	2.25	2.45
0	2.74	3.16	1.97	3.76	2.66	3.82	2.33	2.99	3.83	3.09	2.05	2.51	2.05
0	3.17	2.55	2.9	2.9	3.12	2.7	2.17	2.76	3.71	2.24	1.75	2.66	2.34
0	2.44	2.55	2.25	3.09	2.7	2.8	2.57	2.73	3.06	2.18	2.01	2.36	3.3
0	3	2.6	1.99	2.26	2.92	2.29	2.44	2.75	3	2.26	1.9	2.63	2.39
0	2.45	2.86	2.8	3.14	2.19	3	2.64	2.44	3.72	2.55	1.8	2.75	2.8
1	2.15	3.25	2.2	2.55	2.1	3.09	1.45	2.9	3.3	2.2	2.63	2.45	2.21
1	2.89	2.38	2.49	2.28	1.96	2.79	1.59	2.13	3.01	2.34	2.88	2.18	2.54
1	2.55	2.84	1.86	2.43	2.35	2.59	1.69	2.19	2.15	2.1	3.38	2.44	2.2
1	2.46	2.1	2.1	1.6	2.57	3.35	1.27	2.588	1.8	2.47	3	2.7	2.29
1	2.44	3.04	2.15	2.43	1.36	2.29	1.64	2.5799	2.9	1.93	2.7	2.45	2.27
1	2.48	3.2	2.22	2.3	1.92	2.86	2.03	2.4	2.1	1.48	3.1	2.35	2.1
1	2.89	2.9	2.28	2.1	2.49	2.49	1.73	2.72	2.55	2.54	2.9	2.4	2.24
1	2	3.34	2.4	1.81	2.61	2.77	2.08	2.96	2.6	2.22	2.88	2.6	2.44
2	2.58	2.63	1.6	1.9	2.59	2.42	1.44	2.66	2.38	2.4	2.6	2.4	2.2
2	2.23	2.84	1.8	2.33	2.41	2.01	1.96	2.66	2.53	2.46	2.69	2.49	2.44
2	2.96	2.17	1.93	1.49	2.52	2.95	1.56	2.84	2.52	2.57	2.41	2.6	2.4
2	3.03	2.83	2.03	1.71	2	2.79	1.65	2.6	2.43	2.56	2.46	2.4	2.16
2	2.67	2.9	2.67	2.1	1.53	2.27	1.75	2.8	2.8	2.04	2.45	2.5	2.3
2	2.4	3.22	2.36	2.73	1.45	2.45	1.68	2.5	2.06	2.35	2.5	2.55	2.23
2	2.64	3.28	2.1	2.83	1.99	2.14	1.71	2.03	2.5	2.3	2.44	2.44	2.3
2	2.61	3.26	2.41	1.83	1.57	2.61	1.66	2.58	2.6	2.22	2.66	2.78	2.39
3	3.28	3.11	2.09	1.85	2.07	2.78	1.74	2.56	2.7	1.81	2.93	2.44	1.89
3	3	3.11	2.14	2.01	2.51	2.46	1.66	2.2	1.83	2.8	3.11	2.02	1.56
3	2.53	2.58	1.98	2.12	1.88	2.5	1.89	2.53	2.34	2.92	2.7	2.3	2.38
3	2.51	2.54	1.64	2.1	2.23	2.9	1.76	2.7	2.62	2.2	2.28	1.9	1.98
3	2.6	2.5	1.66	2.43	1.77	1.93	1.74	2.67	1.9	2.19	2.55	2.1	2.2
3	2.45	2.84	2.13	2.48	2.22	2.3	1.92	2.21	2.26	2.03	2.88	2.3	2.56
3	2.46	2.83	2.07	1.45	1.99	1.74	1.57	2.8	2.12	1.7	2.66	2.39	1.51
3	1.95	2.96	2.17	2.35	2.24	2.08	1.75	2.7	2.26	1.75	2.65	2.66	1.77
4	1.73	2.44	2.06	1.1	2.15	2.22	1.35	2.32	2.22	1.96	1.86	1.24	1.99
4	1.55	2.71	2.28	1.31	1.8	2.21	1.11	2	2.68	2.22	3.17	1.23	2.3
4	2.24	2.84	1.8	0	2.08	2.19	1.5	2.4	2.38	0.89	3.29	2.2	1.76
4	2.23	2.05	1.35	1.23	2.06	2.26	1.01	2.4	2.25	2.32	2.46	2.71	2.03
4	2.33	2.51	1.95	0.8	0.72	2.49	0.57	2.65	2.5	2.73	2.25	2.43	1.89
4	2.41	2.56	1.83	2.12	1.52	2.35	0.82	2.5	2.2	2.59	2.66	2.67	2.03
4	2.23	2.32	2.08	1.97	1.6	2.3	0.99	2.68	2.28	0	2.44	2.1	2.45
4	3.18	2.68	2.27	0	1.2	2.1	0.64	2.4	2.4	0	2.55	2.38	1.76
5	2.04	2.14	1.37	1.37	1.8	1.3	1.4	2.3	1.74	1.8	1.6	2.51	1.55
5	2.26	2.26	1.52	0	2.05	1.33	1.7	2.56	1.05	2.22	3.12	1.9	1.6
5	1.9	2.15	2.39	1.07	1.5	1.6	1.19	2.2	1.08	1.77	2.76	2.54	1.87
5	2.04	2.58	1.42	2.12	2.02	0.65	1.3	2.29	1.3	1.22	2.64	1.52	1.92
5	2.74	2.8	1.6	1.4	0	0.78	1.33	2.8	1.28	1.22	2.5	2.1	2.05
5	2.58	2.03	2.6	1.83	2.61	1.1	1.32	1.59	1.3	1.4	2.41	2.2	2.18
5	1.79	2.9	1.8	1.1	2.28	1.24	1.28	1.84	1.5	1.73	2.6	2.1	1.93
5	1.01	1.7	1.8	1.08	1.23	1.29	1.32	2.65	1.2	0	2.57	2.06	2.29
